# Supplementary material for: Comparison of a Prototype SARS-CoV-2 Lateral Flow IMMUNOASSAY with the BinaxNOWTM COVID-19 Antigen CARD
Source: MDPI journal article supplement (doi:10.3390/v14122609), 2022-11-23
Supplement: s1 [file s1]

Supplementary Figures

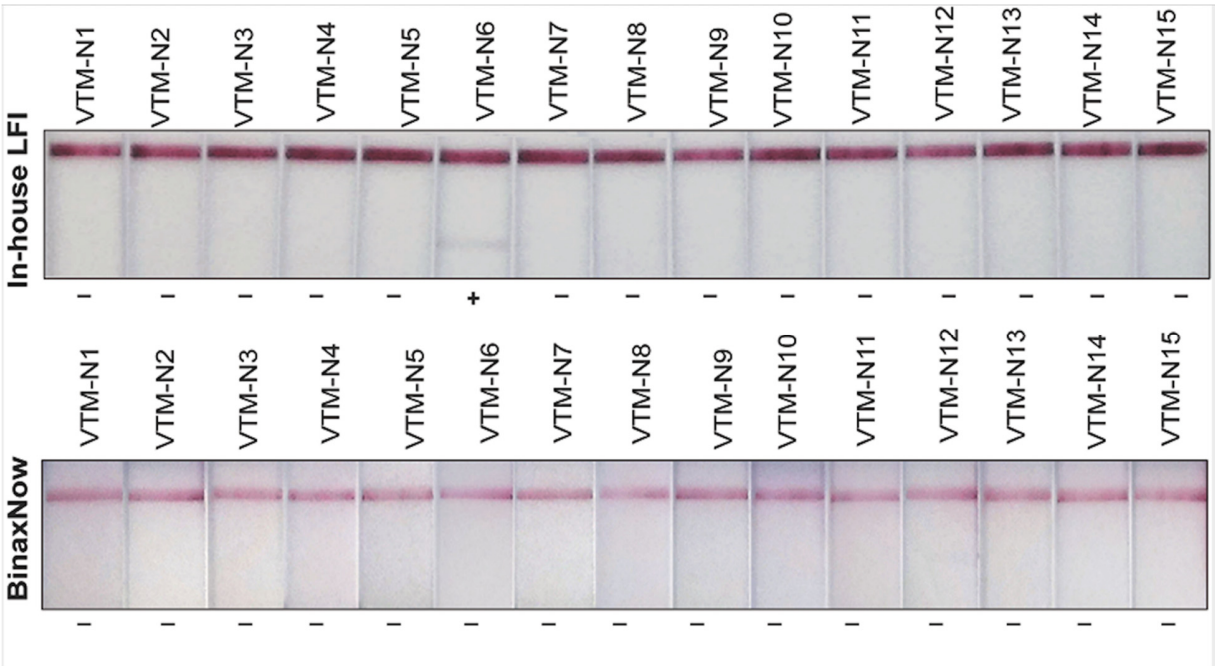

**Figure S1.** Testing of rt-PCR negative clinical specimens preserved in VTM with the 1CV7/1CV14 LFI and BinaxNOW™ (20 µL sample/test)

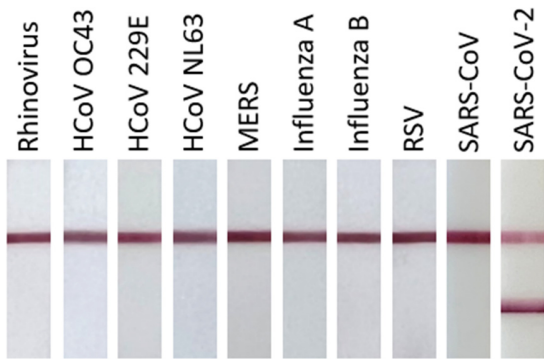

**Figure S2.** Cross-reactivity testing of 1CV7/1CV14 LFI. Rhinovirus, HCoV 229E, MERS, influenza A, influenza B, RSV, and SARS-CoV-2 concentrations are  $1 \times 10^5$  TCID<sub>50</sub>/mL. Due to diluted stock concentrations, HCoV OC43 and HCoV NL63 are at  $8.9 \times 10^4$  TCID<sub>50</sub>/mL and  $1.6 \times 10^4$  TCID<sub>50</sub>/mL, respectively. SARS-CoV was tested at  $1 \times 10^5$  pfu/mL.

### A. VTM-N1 (18,231 matching reads)

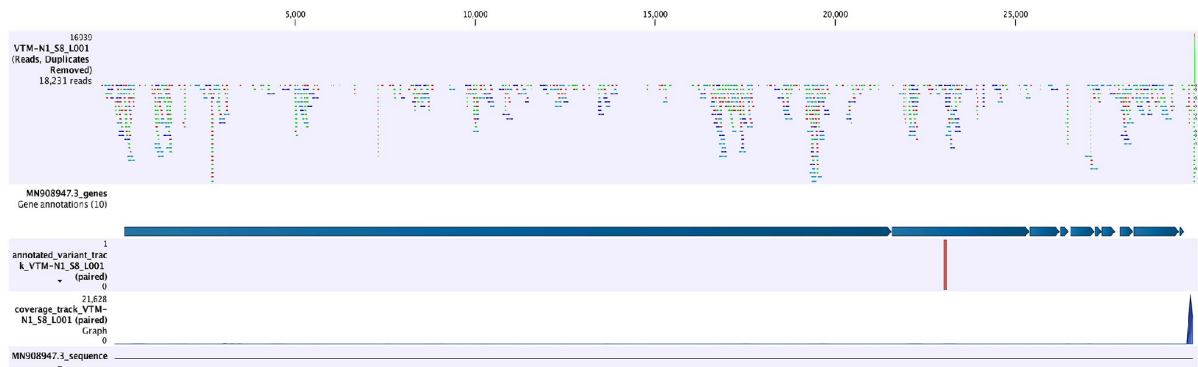

### B. VTM-N6 (329,717 matching reads)

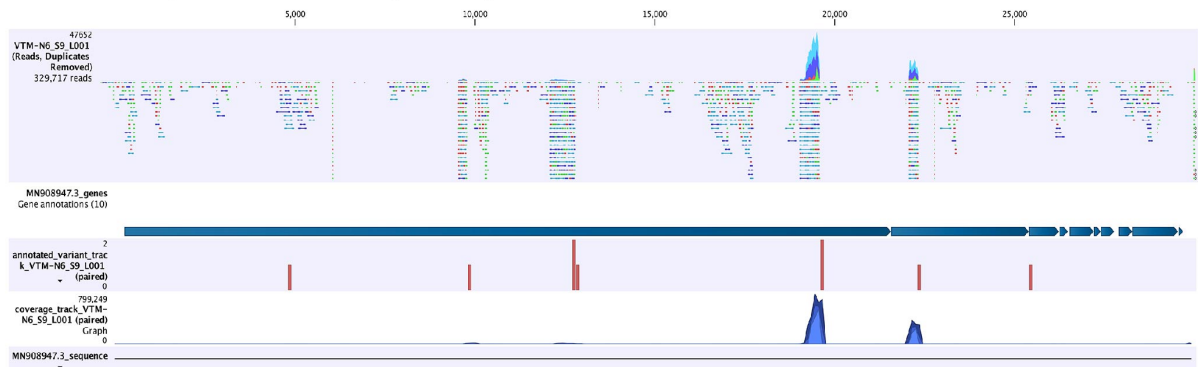

**Figure S3.** Sequencing of the genomic RNA from the nasopharyngeal swabs of these two specimens showed high levels of the SARS-CoV-2 genome in VTM-N6 as compared to minimal reads in another SARS-CoV-2 negative specimen (VTM-N1).

**Table S1.** All BA.1 clinical specimens with corresponding Ct values.

| UNR sample IDs | pango_lineage | Ct values |
|----------------|---------------|-----------|
| VTM-BA1-1      | BA.1.1        | 25.09     |
| VTM-BA1-2      | BA.1.1        | 24.32     |
| VTM-BA1-3      | BA.1.1        | 26.25     |
| VTM-BA1-4      | BA.1.1        | 30.06     |
| VTM-BA1-5      | BA.1.1        | 20.43     |
| VTM-BA1-6      | BA.1.1        | 25.66     |
| VTM-BA1-7      | BA.1.1.1      | 35.54     |
| VTM-BA1-8      | BA.1          | 32.36     |
| VTM-BA1-9      | BA.1.1        | 26.86     |
| VTM-BA1-10     | BA.1.15       | 29.56     |
| VTM-BA1-11     | BA.1.1        | 26.57     |
| VTM-BA1-12     | BA.1          | 27.79     |
| VTM-BA1-13     | BA.1.1        | 27.84     |
| VTM-BA1-14     | BA.1          | 28.67     |
| VTM-BA1-15     | BA.1          | 28.82     |

**Table S2.** All BA.2 and sub-variant BA.2 clinical specimens with corresponding Ct values.

| UNR Sample ID | pango_lineage | Ct values |
|---------------|---------------|-----------|
| VTM-BA2-1     | BA.2          | 23.998    |
| VTM-BA2-2     | BA.2          | 26.182    |
| VTM-BA2-3     | BA.2          | 22.799    |
| VTM-BA2-4     | BA.2          | 15.164    |
| VTM-BA2-5     | BA.2          | 21.678    |
| VTM-BA2-6     | BA.2          | 31.838    |
| VTM-BA2-7     | BA.2.3        | 24.763    |
| VTM-BA2-8     | BA.2          | 30.051    |
| VTM-BA2-9     | BA.2          | 26.558    |
| VTM-BA2-10    | BA.2.3        | 24.626    |
| VTM-BA2-11    | BA.2          | 15.106    |
| VTM-BA2-12    | BA.2          | 19.881    |
| VTM-BA2-13    | BA.2          | 25.742    |
| VTM-BA2-14    | BA.2          | 14.989    |
| VTM-BA2-15    | BA.2          | 20.665    |
| VTM-BA2-16    | BA.2.9        | 23.163    |
| VTM-BA2-18    | BA.2.9        | 15.458    |
| VTM-BA2-20    | BA.2          | 16.75     |
| VTM-BA2-21    | BA.2.3        | 21.354    |
| VTM-BA2-22    | BA.2.3        | 17.214    |
| VTM-BA2-23    | BA.2          | 14.768    |
| VTM-BA2-24    | BA.2.9        | 16.405    |
| VTM-BA2-25    | BA.2          | 16.905    |
| VTM-BA2-27    | BA.2          | 22.68     |
| VTM-BA2-29    | BA.2          | 21.115    |
| VTM-BA2-30    | BA.2.3        | 14.832    |
| VTM-BA2-31    | BA.2          | 28.222    |
| VTM-BA2-32    | BA.2          | 15.229    |
| VTM-BA2-33    | BA.2          | 15.371    |
| VTM-BA2-36    | BA.2          | 15.158    |
| VTM-BA2-39    | BA.2.3        | 26.823    |
| VTM-BA2-40    | BA.2          | 20.231    |
| VTM-BA2-42    | BA.2          | 14.301    |
| VTM-BA2-44    | BA.2          | 22.529    |
| VTM-BA2-45    | BA.2          | 26.262    |

|            |           |        |
|------------|-----------|--------|
| VTM-BA2-46 | BA.2.10   | 17.963 |
| VTM-BA2-48 | BA.2      | 17.177 |
| VTM-BA2-49 | BA.3      | 21.122 |
| VTM-BA2-17 | BA.2.12.1 | 25.148 |
| VTM-BA2-19 | BA.2.12.1 | 19.917 |
| VTM-BA2-26 | BA.2.12.1 | 20.486 |
| VTM-BA2-34 | BA.2.12.1 | 14.365 |
| VTM-BA2-35 | BA.2.12.1 | 17.353 |
| VTM-BA2-37 | BA.2.12.1 | 26.699 |
| VTM-BA2-38 | BA.2.12.1 | 18.873 |
| VTM-BA2-41 | BA.2.12.1 | 27.925 |
| VTM-BA2-43 | BA.2.12.1 | 18.31  |
| VTM-BA2-47 | BA.2.12.1 | 16.462 |
| VTM-BA2-50 | BA.2.12.1 | 16.888 |
| VTM-BA2-51 | BA.2.12.1 | 19.563 |
| VTM-BA2-53 | BA.2.12.1 | 17.416 |
| VTM-BA2-54 | BA.2.12.1 | 15.185 |

**Table S3.** All BA.4 and BA.5 clinical specimens with corresponding Ct values.

| UNR Sample ID | pango_lineage | Ct values |
|---------------|---------------|-----------|
| VTM-BA4-1     | BA.4          | 28.893    |
| VTM-BA4-2     | BA.4          | 25.777    |
| VTM-BA4-3     | BA.4          | 24.901    |
| VTM-BA4-4     | BA.4          | 26.409    |
| VTM-BA4-5     | BA.4          | 18.941    |
| VTM-BA4-6     | BA.4          | 27.915    |
| VTM-BA4-7     | BA.4          | 16.405    |
| VTM-BA4-8     | BA.4          | 21.541    |
| VTM-BA4-9     | BA.4          | 16.989    |
| VTM-BA4-10    | BA.4          | 27.405    |
| VTM-BA5-1     | BA.5          | 18.466    |
| VTM-BA5-2     | BA.5          | 28.567    |
| VTM-BA5-3     | BA.5          | 31.162    |
| VTM-BA5-4     | BA.5          | 26.698    |
| VTM-BA5-5     | BA.5          | 15.617    |
| VTM-BA5-6     | BA.5          | 17.32     |
| VTM-BA5-7     | BA.5          | 18.398    |
| VTM-BA5-8     | BA.5          | 19.34     |
| VTM-BA5-9     | BA.5          | 17.601    |
| VTM-BA5-10    | BA.5          | 14.826    |
| VTM-BA5-11    | BA.5          | 17.25     |
| VTM-BA5-12    | BA.5          | 18.786    |
| VTM-BA5-13    | BA.5          | 15.14     |
| VTM-BA5-14    | BA.5          | 26.569    |
| VTM-BA5-15    | BA.5          | 19.405    |
| VTM-BA5-16    | BA.5          | 19.493    |
| VTM-BA5-17    | BA.5          | 22.089    |
| VTM-BA5-18    | BA.5          | 21.489    |
| VTM-BA5-19    | BA.5          | 27.24     |
| VTM-BA5-20    | BA.5          | 27.457    |
| VTM-BA5-21    | BA.5          | 28.65     |

**Table S4.** All mAbs generated for mAb library. Subclass is indicated as well as reactivity toward both recombinant NP and viral lysate: “+” indicating reactive and “-” indicating non-reactive.

| Clone | Subclass | Reactivity to recombinant NP (+/-) | Reactivity to inactivated virus (+/-) |
|-------|----------|------------------------------------|---------------------------------------|
| 1CV1  | IgG2a    | +                                  | +                                     |
| 1CV2  | IgG1     | +                                  | +                                     |
| 1CV3  | IgG1     | +                                  | +                                     |
| 1CV4  | IgG1     | +                                  | +                                     |
| 1CV5  | IgG1     | +                                  | +                                     |
| 1CV6  | IgG2a    | +                                  | +                                     |
| 1CV7  | IgG1     | +                                  | +                                     |
| 1CV8  | IgG1     | +                                  | +                                     |
| 1CV9  | IgG2b    | +                                  | +                                     |
| 1CV10 | IgG1     | +                                  | +                                     |
| 1CV11 | IgG1     | +                                  | +                                     |
| 1CV12 | IgG1     | +                                  | +                                     |
| 1CV13 | IgG1     | +                                  | +                                     |
| 1CV14 | IgG2b    | +                                  | +                                     |
| 1CV15 | IgG2b    | +                                  | +                                     |
| 1CV16 | IgG1     | +                                  | +                                     |
| 1CV17 | IgG1     | +                                  | +                                     |
| 1CV18 | IgG1     | +                                  | -                                     |

**Table S5.** All by all testing of capture/detection pairs. Darker green indicates a higher difference between signal and background.

[illegible]
